# Supplementary material
Source: PubMed Central journal article supplement (PMC3471710)
Supplement: supp_M112.398131_jbc.M112.398131-1.pdf [file supp_M112.398131_jbc.M112.398131-1.pdf]

Supplemental Figure Legends:

Figure S1. Cellular sensitivity to H<sub>2</sub>O<sub>2</sub>. Cells were exposed to indicated concentrations of H<sub>2</sub>O<sub>2</sub> for 2 hours. After treatment, cells remain attached on the culture plates were washed, trypsinized and counted. shRNA#2+D5 refers to cells stably transfected with KIAA1530 shRNA and then complemented with SFB-tagged KIAA1530 D5 mutant. shRNA#2+D6 refers to cells stably transfected with KIAA1530 shRNA and then complemented with SFB-tagged KIAA1530 D6 mutant.

Figure S2. Diagram of KIAA1530 indicates its multiple protein-protein interaction domains.

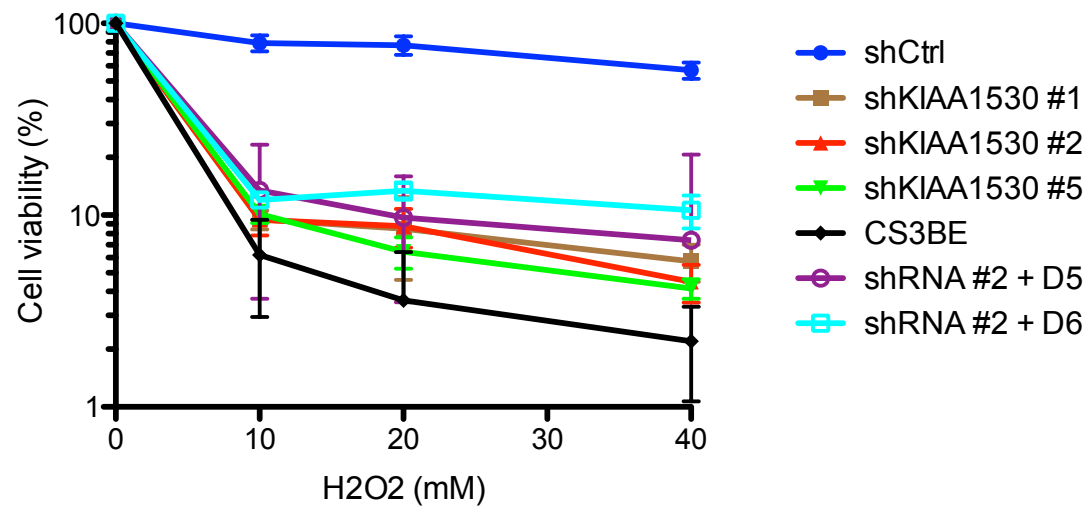

Figure S1

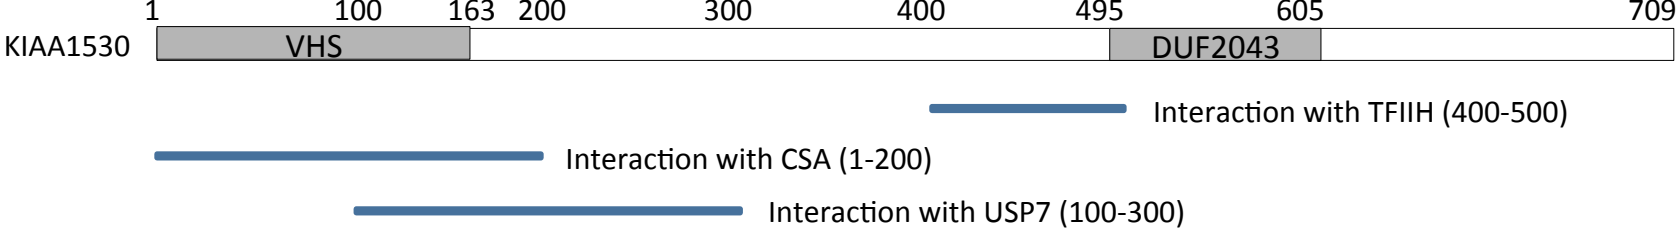

Figure S2
